# Supplementary material for: Trends in Psychotropic Medication Prescriptions in Urban China From 2013 to 2017: National Population-Based Study
Source: PubMed Central journal article supplement (PMC8424045; doi:10.3389/fpsyt.2021.727453), 2021-08-25
Supplement: Data_Sheet_1.pdf [file Data_Sheet_1.pdf]

## *Supplementary Material*

**eTable 1 The population structure of the 2010 Chinese census and the study population**

|                                 |               | Age, No. (million, %) |                |              |
|---------------------------------|---------------|-----------------------|----------------|--------------|
|                                 |               | 0–14                  | 15–64          | ≥65          |
| <b>2010 Chinese census</b>      |               |                       |                |              |
|                                 | <b>Male</b>   | 119.79 (8.99)         | 505.33 (37.91) | 57.21 (4.29) |
|                                 | <b>Female</b> | 101.53 (7.62)         | 487.23 (36.56) | 61.72 (4.63) |
| <b>Study population in 2013</b> |               |                       |                |              |
|                                 | <b>Male</b>   | 15.08 (8.43)          | 67.89 (37.93)  | 9.49 (5.30)  |
|                                 | <b>Female</b> | 12.87 (7.19)          | 63.67 (35.57)  | 9.99 (5.58)  |
| <b>Study population in 2014</b> |               |                       |                |              |
|                                 | <b>Male</b>   | 15.97 (8.59)          | 70.22 (37.76)  | 9.86 (5.30)  |
|                                 | <b>Female</b> | 13.64 (7.34)          | 65.89 (35.43)  | 10.37 (5.58) |
| <b>Study population in 2015</b> |               |                       |                |              |
|                                 | <b>Male</b>   | 16.66 (8.44)          | 74.42 (37.71)  | 10.64 (5.39) |
|                                 | <b>Female</b> | 14.24 (7.22)          | 70.12 (35.53)  | 11.25 (5.71) |
| <b>Study population in 2016</b> |               |                       |                |              |
|                                 | <b>Male</b>   | 17.57 (8.74)          | 74.91 (37.25)  | 11.30 (5.62) |

|                                 |               |              |               |              |
|---------------------------------|---------------|--------------|---------------|--------------|
|                                 | <b>Female</b> | 15.03 (7.48) | 70.36 (34.99) | 11.93 (5.92) |
| <b>Study population in 2017</b> |               |              |               |              |
|                                 | <b>Male</b>   | 17.03 (8.51) | 75.26 (37.60) | 11.00 (5.50) |
|                                 | <b>Female</b> | 14.57 (7.28) | 70.66 (35.30) | 11.64 (5.81) |

Note: The 2010 Chinese census was the latest national census in China.

**eTable 2 The 63 cities included in this study**

| <b>Region</b> | <b>Province</b> | <b>City</b> | <b>Type</b>             | <b>Year of data</b>          |
|---------------|-----------------|-------------|-------------------------|------------------------------|
| Northeast     | Jilin           | Changchun   | Provincial capital city | 2013, 2014, 2015, 2016, 2017 |
|               |                 | Tonghua     | Prefecture-level city   | 2013, 2014, 2015, 2016, 2017 |
|               | Liaoning        | Shenyang    | Provincial capital city | 2013, 2014, 2015, 2016, 2017 |
|               |                 | Dalian      | Prefecture-level city   | 2013, 2014, 2015, 2016, 2017 |
|               | Heilongjiang    | Harbin      | Provincial capital city | 2013, 2014, 2015, 2016, 2017 |
|               |                 | Heihe       | Prefecture-level city   | 2013, 2014, 2015, 2016, 2017 |
| East          |                 | Shanghai    | Municipality            | 2013, 2014, 2015, 2016, 2017 |
|               | Anhui           | Hefei       | Provincial capital city | 2013, 2014, 2015, 2016, 2017 |
|               |                 | Anqing      | Prefecture-level city   | 2014, 2015, 2016, 2017       |

|  |          |             |                         |                              |                              |
|--|----------|-------------|-------------------------|------------------------------|------------------------------|
|  | Shandong | Jinan       | Provincial capital city | 2014, 2015, 2016, 2017       |                              |
|  |          | Zibo        | Prefecture-level city   | 2013, 2014, 2015, 2016, 2017 |                              |
|  |          | Weifang     | Prefecture-level city   | 2013, 2014, 2015, 2016, 2017 |                              |
|  | Jiangsu  | Nanjing     | Provincial capital city | 2013, 2014, 2015, 2016,      |                              |
|  |          | Nantong     | Prefecture-level city   | 2013, 2015, 2016, 2017       |                              |
|  |          | Lianyungang | Prefecture-level city   | 2015, 2016, 2017             |                              |
|  | Jiangxi  | Nanchang    | Provincial capital city | 2013, 2014, 2015, 2016, 2017 |                              |
|  |          | Jiujiang    | Prefecture-level city   | 2013, 2014, 2015, 2016, 2017 |                              |
|  | Zhejiang | Hangzhou    | Provincial capital city | 2013, 2014, 2015, 2016, 2017 |                              |
|  |          | Jinhua      | Prefecture-level city   | 2013, 2014, 2015, 2016, 2017 |                              |
|  | Fujian   | Fuzhou      | Provincial capital city | 2013, 2014, 2015, 2016, 2017 |                              |
|  |          | Xiamen      | Prefecture-level city   | 2013, 2014, 2015, 2016, 2017 |                              |
|  | Middle   | Henan       | Zhengzhou               | Provincial capital city      | 2013, 2014, 2015, 2016, 2017 |
|  |          |             | Luoyang                 | Prefecture-level city        | 2015, 2015, 2016, 2017       |

|          |                |              |                         |                              |
|----------|----------------|--------------|-------------------------|------------------------------|
|          | Hubei          | Wuhan        | Provincial capital city | 2013, 2014, 2015, 2016, 2017 |
|          |                | Jingzhou     | Prefecture-level city   | 2013, 2014, 2015, 2016, 2017 |
|          |                | Xiangyang    | Prefecture-level city   | 2014, 2015, 2016, 2017       |
|          | Hunan          | Changsha     | Provincial capital city | 2013, 2014, 2015, 2016, 2017 |
|          |                | Yueyang      | Prefecture-level city   | 2013, 2014, 2015, 2016, 2017 |
| North    |                | Beijing      | Municipality            | 2013, 2014, 2015, 2016, 2017 |
|          |                | Tianjin      | Municipality            | 2013, 2014, 2015, 2016, 2017 |
|          | Inner Mongolia | Hohhot       | Provincial capital city | 2013, 2014, 2015, 2016, 2017 |
|          |                | Baotou       | Prefecture-level city   | 2013, 2014, 2015, 2016, 2017 |
|          | Shanxi         | Taiyuan      | Provincial capital city | 2013, 2014, 2015, 2016, 2017 |
|          |                | Datong       | Prefecture-level city   | 2013, 2014, 2015, 2016, 2017 |
|          | Hebei          | Shijiazhuang | Provincial capital city | 2013, 2014, 2015, 2016, 2017 |
|          |                | Qinhuangdao  | Prefecture-level city   | 2013, 2014, 2015, 2016, 2017 |
|          | South          | Guangdong    | Guangzhou               | Provincial capital city      |
| Dongguan |                |              | Prefecture-level city   | 2014, 2015, 2016, 2017       |

|           |          |                                   |                         |                              |
|-----------|----------|-----------------------------------|-------------------------|------------------------------|
|           |          | Shenzhen                          | Prefecture-level city   | 2013, 2015, 2016, 2017       |
|           | Guangxi  | Nanning                           | Provincial capital city | 2013, 2014, 2015, 2016, 2017 |
|           |          | Liuzhou                           | Prefecture-level city   | 2013, 2014, 2015, 2016, 2017 |
|           | Hainan   | Haikou                            | Provincial capital city | 2013, 2014, 2015, 2016, 2017 |
|           |          | Sanya                             | Prefecture-level city   | 2013, 2014, 2015, 2016, 2017 |
| Northwest | Ningxia  | Yinchuan                          | Provincial capital city | 2013, 2016, 2017             |
|           | Xinjiang | Urumqi                            | Provincial capital city | 2013, 2014, 2015, 2016, 2017 |
|           |          | Yili Kazakh Autonomous Prefecture | Prefecture-level city   | 2013, 2014, 2015, 2016, 2017 |
|           |          | Bingtuan                          | Prefecture-level city   | 2013, 2014, 2016, 2017       |
|           | Gansu    | Lanzhou                           | Provincial capital city | 2013, 2014, 2017             |
|           |          | Qingyang                          | Prefecture-level city   | 2014, 2015, 2016, 2017       |
|           |          | Baiyin                            | Prefecture-level city   | 2013, 2014, 2015, 2017       |
|           | Shaanxi  | Xi'an                             | Provincial capital city | 2013, 2014, 2015, 2016, 2017 |
|           |          | Xianyang                          | Prefecture-level city   | 2013, 2014, 2015, 2016, 2017 |

|           |         |                                      |                         |                              |
|-----------|---------|--------------------------------------|-------------------------|------------------------------|
|           | Qinghai | Xining                               | Provincial capital city | 2013, 2014, 2015, 2016, 2017 |
|           |         | Haibei Tibetan Autonomous Prefecture | Prefecture-level city   | 2013, 2014, 2015, 2016, 2017 |
| Southwest |         | Chongqing                            | Municipality            | 2013, 2014, 2015, 2016, 2017 |
|           | Yunnan  | Kunming                              | Provincial capital city | 2013, 2014, 2015, 2016, 2017 |
|           |         | Yuxi                                 | Prefecture-level city   | 2013, 2014, 2015, 2016, 2017 |
|           | Sichuan | Chengdu                              | Provincial capital city | 2013, 2014, 2015, 2016, 2017 |
|           |         | Mianyang                             | Prefecture-level city   | 2013, 2014, 2015, 2016, 2017 |
|           | Tibet   | Lhasa                                | Provincial capital city | 2013, 2014, 2015, 2016, 2017 |
|           |         | Linzhi                               | Prefecture-level city   | 2013, 2014, 2015, 2016, 2017 |
|           | Guizhou | Guiyang                              | Provincial capital city | 2013, 2014, 2015, 2016, 2017 |
|           |         | Zunyi                                | Prefecture-level city   | 2014, 2015, 2016, 2017       |

Note: The city inclusion criteria were as follows: (1) all 27 provincial capital cities and four municipalities in mainland China and (2) one to two prefecture-level cities from each of the 27 provinces.

**eTable 3 The classification of psychotropic medications in this study**

| • | • ATC code | • Gen eric name |
|---|------------|-----------------|
|---|------------|-----------------|

| • <b>Type</b>                                                      | •                                                                                                          | •                                                                                                                                                                                                                                                                                                                                                                                                                                                                                                                                                                                                                  |
|--------------------------------------------------------------------|------------------------------------------------------------------------------------------------------------|--------------------------------------------------------------------------------------------------------------------------------------------------------------------------------------------------------------------------------------------------------------------------------------------------------------------------------------------------------------------------------------------------------------------------------------------------------------------------------------------------------------------------------------------------------------------------------------------------------------------|
| Antiepileptic drugs                                                | <ul style="list-style-type: none"> <li>• N03A (N03AA, N03AB, N03AD, N03AE, N03AF, N03AG, N03AX)</li> </ul> | Propionamide, sodium valproate, magnesium valproate, ethylsuccinamine, ilepcimide, gabapentin, carbamazepine, zonisamide, compound phenobarbital sodium bromide, compound pheniramine, oxcarbazepine, levetiracetam, primidone, topiramate, lamotrigine, pregabalin, aminobutyric acid, aminobutyric acid sodium chloride, clonazepam, phenytoin sodium, phenobarbital, vanillin                                                                                                                                                                                                                                   |
| <ul style="list-style-type: none"> <li>• Antipsychotics</li> </ul> | N05A (N05AA, N05AB, N05AC, N05AD, N05AE, N05AF, N05AG, N05AH, N05AL, N05AX)                                | Trifluoperidol, trifluoperazine, penfluridol, risperidone, risperidone-loaded microspheres, pipotiazine, perospirone, quetiapine, compound chlorpromazine chloride, perphenazine, olanzapine, blonanserin, Paliperidone, droperidol, haloperidol, flupentixol, flupentixol decanoate, fluphenazine, amisulpride, chlorpromazine, chlorpromazine and promethazine injection, clopenthixol, chlorprothixene, clozapine, loxapine, zuclopenthixol, zuclopenthixol decanoate, zuclopenthixol acetate, fluphenazine depot, thioridazine, tiapride hydrochloride, tiapride hydrochloride and sodium chloride, sulpiride, |

|                                                                         |                                                                                                   |                                                                                                                                                                                                                                                                                              |
|-------------------------------------------------------------------------|---------------------------------------------------------------------------------------------------|----------------------------------------------------------------------------------------------------------------------------------------------------------------------------------------------------------------------------------------------------------------------------------------------|
|                                                                         |                                                                                                   | sultopride, aripiprazole, ziprasidone                                                                                                                                                                                                                                                        |
| Mood stabilizers                                                        | <ul style="list-style-type: none"> <li>• N05A (N05AN)</li> </ul>                                  | <ul style="list-style-type: none"> <li>• lithium carbonate</li> </ul>                                                                                                                                                                                                                        |
| <ul style="list-style-type: none"> <li>• Anxiolytics</li> </ul>         | <ul style="list-style-type: none"> <li>• N05B</li> </ul>                                          | Buspirone, lorazepam, diazepam, tandospirone, compound diazepam, oxazepam, chlordiazepoxide, hydroxyzine, alprazolam                                                                                                                                                                         |
| <ul style="list-style-type: none"> <li>• Sedatives-hypnotics</li> </ul> | <ul style="list-style-type: none"> <li>• N05C</li> </ul>                                          | triazolam, mixture tribromide, scopolamine, acetylgastrodin, zopiclone, eszopiclone, dexmedetomidine, secobarbital, midazolam, zolpidem, methaqualone, amobarbital, zaleplon, flurazepam, calcium bromide, brotizolam, nitrazepam, estazolam, Phenobarbital and scopolamine, helacid         |
| <ul style="list-style-type: none"> <li>• Antidepressants</li> </ul>     | <ul style="list-style-type: none"> <li>• N06A</li> </ul>                                          | Imipramine, vortioxetine, moclobemide, tianeptine, doxepin, bupropion, paroxetine, duloxetine, venlafaxine, trazodone, fluvoxamine, fluoxetine, clomipramine, reboxetine, mianserin, mirtazapine, milnacipran, sertraline, escitalopram, citalopram, agomelatine, amitriptyline, maprotiline |
| <ul style="list-style-type: none"> <li>• ADHD medications</li> </ul>    | <ul style="list-style-type: none"> <li>• N06B (pemoline, methylphenidate, atomoxetine)</li> </ul> | pemoline, methylphenidate, atomoxetine                                                                                                                                                                                                                                                       |



|                                                                          |                                                                                                                                                      |                                                                                                                                                                                                                                                                                                                                                                                                                                                                                                                                                                                                                                                                                                                                                                                                                                                                                                                    |
|--------------------------------------------------------------------------|------------------------------------------------------------------------------------------------------------------------------------------------------|--------------------------------------------------------------------------------------------------------------------------------------------------------------------------------------------------------------------------------------------------------------------------------------------------------------------------------------------------------------------------------------------------------------------------------------------------------------------------------------------------------------------------------------------------------------------------------------------------------------------------------------------------------------------------------------------------------------------------------------------------------------------------------------------------------------------------------------------------------------------------------------------------------------------|
| <ul style="list-style-type: none"> <li>Nootropic drugs</li> </ul>        | <ul style="list-style-type: none"> <li>N06B (N06BC, N06BX), N06D (N06DX: aniracetam, N06DX: compound cerebroside, N06DX: compound ginkgo)</li> </ul> | <p>Piracetam, N-acetylglycinamide, acetylglutamine and sodium chloride, acetyl glutamine glucose, trisialoganglioside-GT1b, piracetam, piracetam and sodium chloride, piracetam and glucose, pyritinol, pyritinol and sodium chloride, pyritinol and glucose, caffeine, compound piracetam, compound piracetam and cerebroprotein hydrolysate, compound caffeine and sodium glycenophosphate, compound sodium bromide and caffeine, compound porcine cerebroside and ganglioside, compound ginkgo biloba extract, oxiracetam, caffeine, meclofenoxate, huperzine-A, securinine nitrate, strychnine nitrate, muscular amino acids and nucleosides, citicoline, citicoline and sodium chloride, citicoline and glucose, citicoline sodium, citicoline sodium and glucose, idebenone, aniracetam, safflower extract and aceglutamide, vinpocetine, vinpocetine sodium chloride, vinpocetine and glucose, anixitan</p> |
| <ul style="list-style-type: none"> <li>Psycholeptic polypills</li> </ul> | <ul style="list-style-type: none"> <li>N06C</li> </ul>                                                                                               | <p>Flupentixol-melitracen, dititamins and sodium phosphate syrup, dititamins and sodium phosphate syrup,</p>                                                                                                                                                                                                                                                                                                                                                                                                                                                                                                                                                                                                                                                                                                                                                                                                       |

|                                                                                                        |                                                                                    |                                                                            |
|--------------------------------------------------------------------------------------------------------|------------------------------------------------------------------------------------|----------------------------------------------------------------------------|
| <ul style="list-style-type: none"> <li>• Antidementia drugs</li> </ul>                                 | <ul style="list-style-type: none"> <li>• N06D (N06DA, N06DX: Memantine)</li> </ul> | dihydrogalanthamine, rivastigmine, galanthamine base, donepezil, memantine |
| <ul style="list-style-type: none"> <li>• Drugs used in the treatment of addictive disorders</li> </ul> | <ul style="list-style-type: none"> <li>• N07B</li> </ul>                           | Buprenorphine, varenicline, nicotine, lofexidine, naltrexone, methadone    |

Abbreviations: ATC, Anatomical Therapeutic Chemical; ADHD, attention deficit hyperactivity disorder

**eMethods: Statistical methods and analysis plan**

**I. Identification of psychotropic medication users**

Psychotropic medication users in this study are the users of 11 major classes of psychotropic medications—that is, sedatives-hypnotics, anxiolytics, antiepileptic drugs, nootropic drugs, antipsychotics, antidepressants, psycholeptic polypills, antidementia drugs, mood stabilizers, attention deficit hyperactivity disorder (ADHD) medications, and drugs used in addictive disorders. The medication prescription information is kept in the reimbursement records of the medical insurance data, no matter the proportion of medical expenses is reimbursed. The generic names of the drugs are coded according to the World Health Organization (WHO) Anatomical Therapeutic Chemical (ATC) classification codes. The detailed ATC codes and generic names used are shown in **Table S4**.

**eTable 4 The ATC codes and generic names of psychotropic medications used in this study**

| •                   | • ATC code                                                                                                 | • Generic name                                                                                                                                                                                                                                                                                       |
|---------------------|------------------------------------------------------------------------------------------------------------|------------------------------------------------------------------------------------------------------------------------------------------------------------------------------------------------------------------------------------------------------------------------------------------------------|
| • Type              | •                                                                                                          | •                                                                                                                                                                                                                                                                                                    |
| Antiepileptic drugs | <ul style="list-style-type: none"> <li>• N03A (N03AA, N03AB, N03AD, N03AE, N03AF, N03AG, N03AX)</li> </ul> | Propionamide, sodium valproate, magnesium valproate, ethylsuccinamide, ilepcimide, gabapentin, carbamazepine, zonisamide, compound phenobarbital sodium bromide, compound pheniramine, oxcarbazepine, levetiracetam, primidone, topiramate, lamotrigine, pregabalin, aminobutyric acid, aminobutyric |

|                                                                       |                                                                             |                                                                                                                                                                                                                                                                                                                                                                                                                                                                                                                                                                                                                                                          |
|-----------------------------------------------------------------------|-----------------------------------------------------------------------------|----------------------------------------------------------------------------------------------------------------------------------------------------------------------------------------------------------------------------------------------------------------------------------------------------------------------------------------------------------------------------------------------------------------------------------------------------------------------------------------------------------------------------------------------------------------------------------------------------------------------------------------------------------|
|                                                                       |                                                                             | acid sodium chloride, clonazepam, phenytoin sodium, phenobarbital, vanillin                                                                                                                                                                                                                                                                                                                                                                                                                                                                                                                                                                              |
| <ul style="list-style-type: none"> <li>Antipsychotics</li> </ul>      | N05A (N05AA, N05AB, N05AC, N05AD, N05AE, N05AF, N05AG, N05AH, N05AL, N05AX) | Trifluoperidol, trifluoperazine, penfluridol, risperidone, risperidone-loaded microspheres, pipotiazine, perospirone, quetiapine, compound chlorpromazine chloride, perphenazine, olanzapine, blonanserin, Paliperidone, droperidol, haloperidol, flupentixol, flupentixol decanoate, fluphenazine, amisulpride, chlorpromazine, chlorpromazine and promethazine injection, clopenthixol, chlorprothixene, clozapine, loxapine, zuclopenthixol, zuclopenthixol decanoate, zuclopenthixol acetate, fluphenazine depot, thioridazine, tiapride hydrochloride, tiapride hydrochloride and sodium chloride, sulpiride, sultopride, aripiprazole, ziprasidone |
| Mood stabilizers                                                      | <ul style="list-style-type: none"> <li>N05A (N05AN)</li> </ul>              | <ul style="list-style-type: none"> <li>lithium carbonate</li> </ul>                                                                                                                                                                                                                                                                                                                                                                                                                                                                                                                                                                                      |
| <ul style="list-style-type: none"> <li>Anxiolytics</li> </ul>         | <ul style="list-style-type: none"> <li>N05B</li> </ul>                      | Buspirone, lorazepam, diazepam, tandospirone, compound diazepam, oxazepam, chlordiazepoxide, hydroxyzine, alprazolam                                                                                                                                                                                                                                                                                                                                                                                                                                                                                                                                     |
| <ul style="list-style-type: none"> <li>Sedatives-hypnotics</li> </ul> | <ul style="list-style-type: none"> <li>N05C</li> </ul>                      | triazolam, mixture tribromide, scopolamine, acetylgloridin, zopiclone, eszopiclone, dexmedetomidine, secobarbital, midazolam, zolpidem, methaqualone, amobarbital, zaleplon, flurazepam, calcium bromide, brotizolam, nitrazepam, estazolam, Phenobarbital and scopolamine, helcid                                                                                                                                                                                                                                                                                                                                                                       |

|                                                                      |                                                                                                                                                        |                                                                                                                                                                                                                                                                                                                                                                                                                                                                                                                                                                                                                                                                                                                                                                                                                                                                                                                    |
|----------------------------------------------------------------------|--------------------------------------------------------------------------------------------------------------------------------------------------------|--------------------------------------------------------------------------------------------------------------------------------------------------------------------------------------------------------------------------------------------------------------------------------------------------------------------------------------------------------------------------------------------------------------------------------------------------------------------------------------------------------------------------------------------------------------------------------------------------------------------------------------------------------------------------------------------------------------------------------------------------------------------------------------------------------------------------------------------------------------------------------------------------------------------|
| <ul style="list-style-type: none"> <li>• Antidepressants</li> </ul>  | <ul style="list-style-type: none"> <li>• N06A</li> </ul>                                                                                               | <p>Imipramine, vortioxetine, moclobemide, tianeptine, doxepin, bupropion, paroxetine, duloxetine, venlafaxine, trazodone, fluvoxamine, fluoxetine, clomipramine, reboxetine, mianserin, mirtazapine, milnacipran, sertraline, escitalopram, citalopram, agomelatine, amitriptyline, maprotiline</p>                                                                                                                                                                                                                                                                                                                                                                                                                                                                                                                                                                                                                |
| <ul style="list-style-type: none"> <li>• ADHD medications</li> </ul> | <ul style="list-style-type: none"> <li>• N06B (pemoline, methylphenidate, atomoxetine)</li> </ul>                                                      | <p>pemoline, methylphenidate, atomoxetine</p>                                                                                                                                                                                                                                                                                                                                                                                                                                                                                                                                                                                                                                                                                                                                                                                                                                                                      |
| <ul style="list-style-type: none"> <li>• Nootropic drugs</li> </ul>  | <ul style="list-style-type: none"> <li>• N06B (N06BC, N06BX), N06D (N06DX: aniracetam, N06DX: compound cerebroside, N06DX: compound ginkgo)</li> </ul> | <p>Piracetam, N-acetylglycinamide, acetylglutamine and sodium chloride, acetyl glutamine glucose, trisialoganglioside-GT1b, piracetam, piracetam and sodium chloride, piracetam and glucose, pyritinol, pyritinol and sodium chloride, pyritinol and glucose, caffeine, compound piracetam, compound piracetam and cerebroprotein hydrolysate, compound caffeine and sodium glycerophosphate, compound sodium bromide and caffeine, compound porcine cerebroside and ganglioside, compound ginkgo biloba extract, oxiracetam, caffeine, meclofenoxate, huperzine-A, securinine nitrate, strychnine nitrate, muscular amino acids and nucleosides, citicoline, citicoline and sodium chloride, citicoline and glucose, citicoline sodium, citicoline sodium and glucose, idebenone, aniracetam, safflower extract and aceglutamide, vinpocetine, vinpocetine sodium chloride, vinpocetine and glucose, anixitan</p> |

|                                                                                                        |                                                                                    |                                                                                                       |
|--------------------------------------------------------------------------------------------------------|------------------------------------------------------------------------------------|-------------------------------------------------------------------------------------------------------|
| <ul style="list-style-type: none"> <li>• Psycholeptic polypills</li> </ul>                             | <ul style="list-style-type: none"> <li>• N06C</li> </ul>                           | Flupentixol-melitracen, dititamins and sodium phosphate syrup, dititamins and sodium phosphate syrup, |
| <ul style="list-style-type: none"> <li>• Antidementia drugs</li> </ul>                                 | <ul style="list-style-type: none"> <li>• N06D (N06DA, N06DX: Memantine)</li> </ul> | dihydrogalanthamine, rivastigmine, galanthamine base, donepezil, memantine                            |
| <ul style="list-style-type: none"> <li>• Drugs used in the treatment of addictive disorders</li> </ul> | <ul style="list-style-type: none"> <li>• N07B</li> </ul>                           | Buprenorphine, varenicline, nicotine, lofexidine, naltrexone, methadone                               |

## **II. Statistical method to estimate the prescription prevalence of psychotropic medications in each year**

Prescription prevalence of psychotropic medications was estimated by a three-stage approach.

### **1. Stage 1: Estimation of sex- and age-specific prescription prevalence at each city level**

The denominator used to calculate sex- and age-specific prescription prevalence at each city level is the urban population in each sex- and age-specific group of the included cities at each city-level (collected from the population census data). The numerator is the total number of patients prescribed psychotropic medications in each sex- and age-specific group of the included cities at each city-level from the CHIRA database divided by the sampling proportion (since CHIRA database is a sampling database).

### **2. Stage 2: Pooling the city-level-specific prevalence**

The national prescription prevalence of each age group was calculated by pooling the sex- and age-specific prescription prevalence from the same age group at different city levels using a random-effects meta-analysis to account for heterogeneity across different city levels.

The national prescription prevalence of each age group in males was calculated by pooling the age-specific prescription prevalence from the same age group at different city levels in males using a random-effects meta-analysis. Similarly, the national prescription prevalence of each age group in females was calculated by pooling the age-specific prescription prevalence from the same age group at different city levels in females using a random-effects meta-analysis.

### **3. Stage 3: Standardization**

The age-specific pooled prescription prevalence obtained in stage 2 was used to calculate the overall annual prescription prevalence, standardized by the national population census data of the corresponding year.

### III. Pre-specified Statistical Analysis Plan (SAP)

#### 1. Study objective:

To estimate the prescription prevalence of psychotropic medications in urban China by using a repeated cross-sectional study design.

#### 2. Database and study period

The China Health Insurance Research Association (CHIRA) database: 01/01/2013–31/12/2017.

#### 3. Outcome

- The annual prescription prevalence of 11 major classes of psychotropic medications in urban China during 2013–2017.

- 

#### 4. Other covariates definition

- Age: 0–14, 15–64, and  $\geq 65$  years old
- Sex: male, female
- Insurance type: the Urban Employee Basic Medical Insurance (UEBMI) programme, the Urban Residence Basic Medical Insurance (URBMI) programme
- Year: 2013, 2014, 2015, 2016, and 2017
- City level: first-tier, second-tier, third-tier, and fourth-tier and below (The cities in each level is shown in **Table S5**)

**eTable 5 The cities included in each city level**

|             | Cities                                                                                                                                                                                              |
|-------------|-----------------------------------------------------------------------------------------------------------------------------------------------------------------------------------------------------|
| City level  |                                                                                                                                                                                                     |
| First-tier  | Beijing, Guangzhou, Shanghai                                                                                                                                                                        |
| Second-tier | Chengdu, Hangzhou, Nanjing, Shenzhen, Shenyang, Tianjin, Wuhan, Chongqing, Jinan                                                                                                                    |
| Third-tier  | Bingtuan, Dalian, Fuzhou, Guiyang, Harbin, Hefei, Kunming, Lanzhou, Nanchang, Nanning, Nantong, Xiamen, Shijiazhuang, Taiyuan, Urumqi, Xi'an, Changchun, Changsha, Zhengzhou, Zibo, Dongguan, Zunyi |

|                       |                                                                                                                                                                                                                                                                                                                          |
|-----------------------|--------------------------------------------------------------------------------------------------------------------------------------------------------------------------------------------------------------------------------------------------------------------------------------------------------------------------|
| Fourth-tier and below | Baiyin, Baotou, Datong, Haibei Tibetan Autonomous Prefecture, Haikou, Heihe, Hohhot, Jinhua, Jingzhou, Jiujiang, Lhasa, Linzhi, Liuzhou, Mianyang, Qinhuangdao, Sanya, Tonghua, Weifang, Xining, Xianyang, Yili Kazakh Autonomous Prefecture, Yinchuan, Yuxi, Yueyang, Anqing, Qingyang, Xiangyang, Lianyungang, Luoyang |
|-----------------------|--------------------------------------------------------------------------------------------------------------------------------------------------------------------------------------------------------------------------------------------------------------------------------------------------------------------------|

The classification of city level was based on the yearbook of China's cities in 2009 (Cheng AD. The yearbook of China's cities. Beijing: The Yearbook of China's Cities Press, 2009)

## 5. Methods

### (1) Prescription prevalence

Prescription prevalence is estimated by a three-stage approach. (Note: detailed description for estimating the prescription prevalence in the primary analysis is moved to the Section II from the original SAP).

### (2) Relative increase in prescription prevalence from 2013 to 2017

- $Relative\ increase = \frac{Prevalence_{2017} - Prevalence_{2013}}{Prevalence_{2013}} \times 100$

### (3) Primary statistics to report:

Prescription prevalence is expressed as per 100 and 95% confidence intervals (CIs).

## 6. Subgroup analysis

Prescription prevalence is calculated in subgroups of calendar year, sex, and age group.

## 7. Proposed Main Tables & Figures

### Table 1 Characteristics of the psychotropic medication users in CHIRA database grouped by calendar year

- Total number of psychotropic medication users in sex-specific group in each



- year
- Total number of psychotropic medication users in age-specific group in each year
- Total number of psychotropic medication users in each year

**Table 2 Characteristics of the study population collected from the Chinese population census grouped by calendar year**

- Total number of study population in sex-specific group in each year
- Total number of study population in age-specific group in each year
- Total number of study population in each year

**Table 3 Prescription prevalence of 11 classes of psychotropic medications from 2013 to 2017 in urban China**

- Prescription prevalence of 11 classes of psychotropic medications in each year during 2013-2017
- Relative increase in prescription prevalence of 11 classes of psychotropic medications from 2013 to 2017
- 

**Table 4 Prescription prevalence of 11 classes of psychotropic medications in 2017 grouped by age group**

- Prescription prevalence of 11 classes of psychotropic medications in age-specific group in 2017

**Table 5 The rank of annual prescription prevalence of 11 classes of psychotropic medications during 2013–2017**

- The rank of prescription prevalence of 11 classes of psychotropic medications in each year during 2013-2017
- 

**Figure 1 Temporal trends in the prescription prevalence of psychotropic medications during 2013-2017 in urban China**

- Prescription prevalence of 11 classes of psychotropic medications in males in each year
- Prescription prevalence of 11 classes of psychotropic medications in females in each year

**Figure 2 Prescription prevalence of psychotropic medications in each age group in 2017 in urban China grouped by sex**

- Prescription prevalence of 11 classes of psychotropic medications in males aged under 14 years in 2017
- Prescription prevalence of 11 classes of psychotropic medications in females aged under 14 years in 2017
- Prescription prevalence of 11 classes of psychotropic medications in males aged 15-64 years in 2017
- Prescription prevalence of 11 classes of psychotropic medications in females aged 15-64 years in 2017
- Prescription prevalence of 11 classes of psychotropic medications in males aged 65 years and older in 2017
- Prescription prevalence of 11 classes of psychotropic medications in females aged 65 years and older in 2017

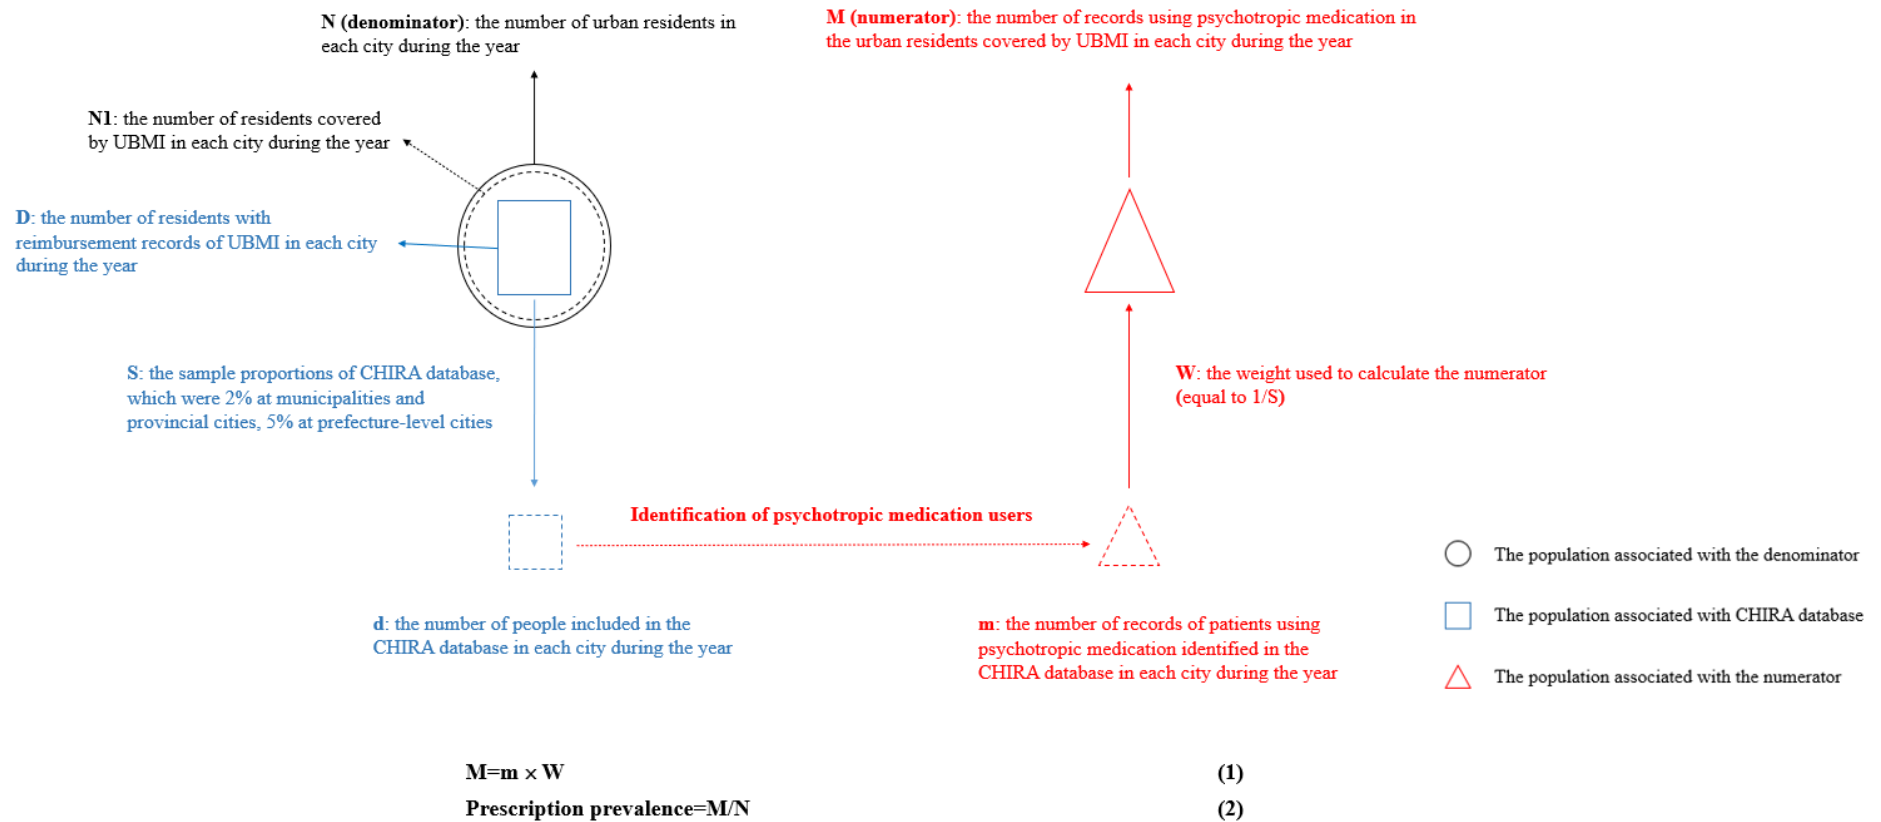

**eFigure 1** The detailed information of the numerator and denominator used to calculate the prescription prevalence of psychotropic medication in each city

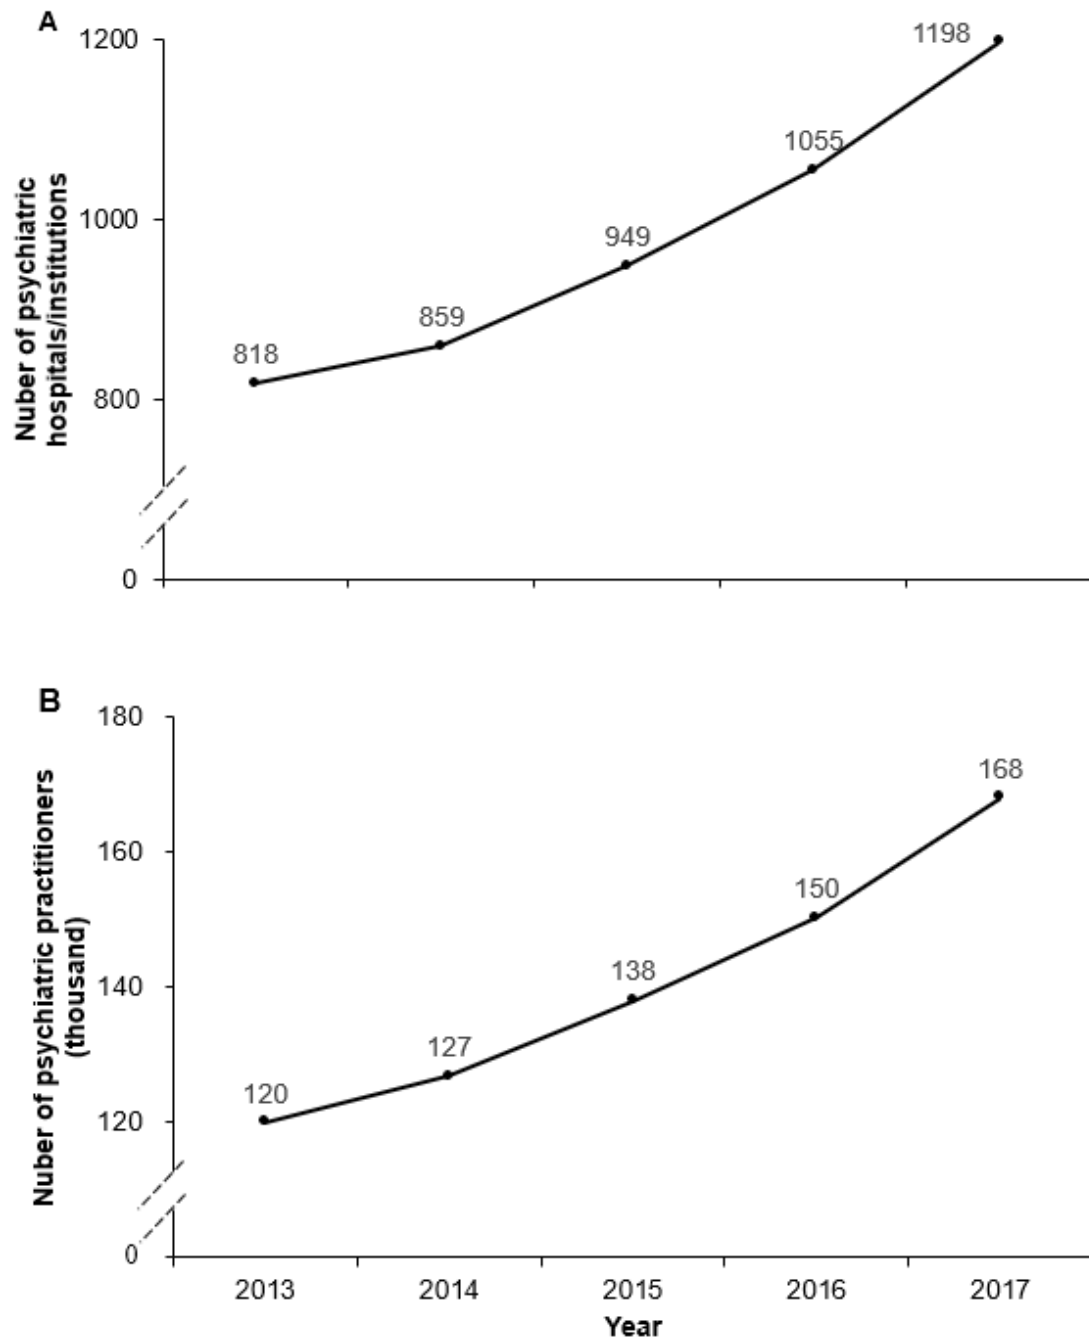

**eFigure 2** Changes in the number of psychiatric hospitals/institutions (A) and psychiatric practitioners (B) during 2013–2017 in China
